# 1 **Sickness behaviour reduces network centrality in wild vampire bats**

2

3 Simon P. Ripperger<sup>1,2,3</sup>, Sebastian Stockmaier<sup>2,4</sup>, Gerald G. Carter<sup>1,2</sup>

4 <sup>1</sup>Department of Ecology, Evolution, and Organismal Biology, The Ohio State University,

5 Columbus, OH, USA

6 <sup>2</sup>Smithsonian Tropical Research Institute, Balboa, Ancón, Panama

7 <sup>3</sup>Museum für Naturkunde, Leibniz-Institute for Evolution and Biodiversity Science, Berlin,

8 Germany

9 <sup>4</sup>Department of Integrative Biology, University of Texas at Austin, Austin, TX, USA

10

## 11 **Abstract**

12 Sickness behaviours, like lethargy, can slow the spread of pathogens across a social network.

13 We conducted a field experiment to investigate how sickness behaviour reduces individual  
14 connectedness in a high-resolution dynamic social network. We captured adult female vampire

15 bats (*Desmodus rotundus*) from a wild roost. To create 'sick' bats, we injected a random half of

16 the bats (n=16) with the immune-challenging substance, lipopolysaccharide, and injected

17 control bats with saline (n=15). Over the next three days, we used proximity sensors to

18 continuously track their associations under natural conditions. The 'sick' bats showed a clear

19 decrease in social connectedness (degree, strength, and eigenvector centrality). Bats in the

20 control group encountered fewer 'sick' bats and also spent less time near them. These effects

21 varied by time of day and declined over 48 hours. High-resolution proximity data allow

22 researchers to define network connections based on how a pathogen spreads (e.g. the

23 minimum contact time or distance for transmission). We therefore show how the estimate of the

24 sickness effect changes as network ties are defined using varying distances and durations of

25 association. Tracking the effects of sickness behaviour on high-resolution dynamic social

26 networks can help create more sophisticated simulations of pathogen transmission through  
27 structured populations.

28

29 **Keywords**

30 disease, dynamic network, lipopolysaccharide, pathogen transmission, social network,

31 *Desmodus rotundus*

32

33 **Authors for correspondence**

34 Simon P. Ripperger, email: [simon.ripperger@gmail.com](mailto:simon.ripperger@gmail.com)

35 Gerald G. Carter, email: [carter.1640@osu.edu](mailto:carter.1640@osu.edu)

36

## 37 **Background**

38           As a pathogen spreads across a population, sickness behaviours – like lethargy,  
39 increased sleep, and reduced movement – can slow pathogen spread, because less socially  
40 connected individuals are often less likely to transmit a pathogen [1-3]. This sickness-induced  
41 ‘social distancing’ can be important for modelling pathogen transmission as a social network  
42 changes over time (i.e. a dynamic social network [4]). Tracking the effects of sickness behaviour  
43 on a dynamic social network requires large datasets with temporal and spatial resolutions that  
44 are high enough to be ecologically useful. Automated tracking of animal associations typically  
45 occurs in the lab [1] or at specific field locations such as feeders or nest boxes [2]. Proximity  
46 sensors by contrast can measure association times and durations, at high spatial and temporal  
47 resolution, among free-ranging animals at any location [5]. Proximity tracking is therefore a  
48 potentially powerful tool for understanding how individual sickness behaviour reshapes a social  
49 network.

50           Here, we induced sickness behaviour in wild-caught vampire bats using injections of  
51 lipopolysaccharide (LPS), which mimics the symptoms of a bacterial infection without an active  
52 pathogen. LPS treatments allow us to isolate the effects of sickness behaviour from parasite-  
53 specific manipulations of host behaviour [6, 7]. After injections, we tagged both the ‘sick’ bats  
54 (injected with LPS) and control bats (injected with only saline) with proximity sensors [8]. We  
55 released them back into their wild colony and tracked changes in their association rates. Based  
56 on the effects of LPS on the physiology and behaviour of captive vampire bats [6, 7], we  
57 predicted reduced association rates between ‘sick’ bats and control bats in the wild.

58           Indeed, LPS-induced sickness behaviour caused a dramatic decrease in network  
59 centrality. The control bats encountered fewer ‘sick’ individuals and also spent less time near  
60 them. For studying pathogen transmission, the links (or edges) in a social network would ideally  
61 be defined based on the pathogen-specific transmission mechanism, because some pathogens  
62 require longer or closer physical contact. In practice, however, most social network edges are

63 defined based on technological or statistical limitations. Therefore, we used resampling to show  
64 how estimates of the sickness effect change when network ties are defined using varying  
65 distances or durations of association.

66

## 67 **Methods**

68

### 69 *Inducing sickness behaviour*

70 We captured bats from a colony of common vampire bats (*Desmodus rotundus*) inside a  
71 hollow tree at Lamanai, Belize. Before sunset on April 24<sup>th</sup> 2018, we blocked all exits of the  
72 roost except one and we used a handnet and mist nets to capture about 100 vampire bats  
73 (including 41 females) until 0500 h the next morning. We kept females in cotton cloth bags, and  
74 measured their mass to ensure they did not differ between the randomly assigned treatment  
75 and control injections (difference in mass = 0.17 g [95% CI: -2.9, 2.4]). We randomly assigned  
76 the females to the test or control treatment by flipping a coin, then adjusted to ensure more  
77 balanced samples. We injected the individuals in the test group under the dorsal skin with 70-  
78 100 µl of LPS (lipopolysaccharide in phosphate-buffered saline, L2630 Sigma-Aldrich, St Louis,  
79 MO, U.S.A.) at a dosage of 5 mg/kg, following previous studies with this species [6, 7]. Bats in  
80 the control group received an injection of the same volume per body mass of phosphate-  
81 buffered saline. One hour after injection, we released 34 females, tagged with proximity  
82 sensors, back into their roost.

83

### 84 *Proximity tracking*

85 To track dyadic associations among the bats, we used custom-built proximity sensors  
86 (see [5, 8, 9] for details). The sensors weighed 1.8 g (including battery and housing) and were  
87 glued to the dorsal fur using skin-bonding latex adhesive (Montreal Ostomy Skin-Bond). Tag  
88 weights were 4.5 – 6.9 % of each bat's mass, in accordance with recommendations for short-

89 term tracking of bats [10]. We placed the antennas of a base station inside the roost for  
90 encounter data download. Each encounter observation includes a duration and received signal  
91 strength indicator (RSSI), which can be used as an estimate for a minimum distance between  
92 two tagged bats during the encounter. We defined a ‘proximity index’ as the percent quantile of  
93 all RSSI values. To define association, we used a proximity index of 85% (i.e. the top 15% of all  
94 encounters ranked by signal strength, Fig. S1). We chose this value by using the same RSSI  
95 value as a previous study linking wild associations to captive interactions (-27 dbm [8]). Past  
96 work [8] suggests these associations involve a proximity of about 0-50 cm.

97 We excluded data from three sensors, which apparently dropped off the bat, either  
98 inside (n=2) or outside (n=1) the roost, evident from the sensor's constant contact with the base  
99 station (i.e. no evidence of exiting or entering the roost). We therefore used association data  
100 from 16 ‘sick’ bats and 15 control bats.

101

### 102 *Network construction*

103 We created social networks where edges were association time. To track associations  
104 over the day, we created social networks for each hour. To measure an LPS effect size, we  
105 created a network for the entire period where we expected an LPS effect based on past work  
106 [7]. This “treatment period” was 3 to 9 h post-injection (1700 - 2300 h). We did not include  
107 associations from the second half of the night because we observed, visually and in the sensor  
108 data, that most of the bats left the roost to forage after midnight. For comparison, we also  
109 created two more networks for the corresponding times of day (24 and 48 h later).

110

### 111 *Hypothesis-testing*

112 To test the effect of LPS on three measures of network centrality, we first fit a general  
113 linear mixed-effects model with treatment (LPS, saline) and day (1, 2, 3) as fixed effects, bat as  
114 a random effect, and the network centrality measure (degree, strength, and eigenvalue,

115 respectively) as a response. We then extracted the standardized model coefficients for the  
116 treatment effect and the interaction between treatment effect and day. If we detected an  
117 interaction, we also fit a linear model for the observations within the first and last day separately  
118 and extracted those standardized treatment effect coefficients. To get two-sided p-values, we  
119 created 10,000 null datasets where the treatment was re-assigned randomly among bats at the  
120 start of the study, then measured the proportion of the null coefficients that were greater than  
121 the observed coefficients, and then doubled those one-sided p-values. This procedure creates a  
122 null model accounting for the non-independent and non-normal structure of the network data  
123 [11]. To assess assortativity of sick and control bats over time, we calculated for each hour the  
124 association probability (proportion of possible pairs that were associated) and the mean  
125 association time (total seconds per period) for three dyad types: control-control, control-sick,  
126 and sick-sick. For all 95% confidence intervals, we used basic nonparametric bootstrapping with  
127 5,000 iterations.

128

### 129 *Measuring effects of network construction on effect size of sickness behaviour*

130 Defining network edges requires deciding what minimum proximity or duration  
131 constitutes an 'association'. With proximity sensor data, this definition is flexible but requires a  
132 trade-off between maximizing the sample size of observations and filtering for observations that  
133 are more meaningful (e.g. closer proximities or longer durations). We inspected how the size  
134 and precision of the LPS effect changed with variations in how networks were constructed. To  
135 do this, we resampled our data using different definitions of association, then we plotted  
136 changes in the number of observations and the treatment effect size (defined as the  
137 unstandardized model coefficient during the treatment period). As a measure of relative  
138 detectability, we used the p-value from the parametric linear model. To investigate the effect of  
139 minimum encounter duration, we defined association at one proximity index (85% as in our  
140 original analysis), but filtered encounters using several values of minimum duration that varied

141 from 0 - 1200 s. To investigate the effect of minimum encounter proximity, we set no minimum  
142 duration (as in our original analysis), but filtered encounters using a proximity index threshold  
143 that varied across several values from 76 - 98 %. Proximity index thresholds below 76% are not  
144 informative given the roost size; thresholds over 98% use less than 2% of the data. Finally, to  
145 assess if the LPS treatment effect size was robust across different proximity thresholds, when  
146 controlling for number of observations, we used several proximity index thresholds varying from  
147 75% to 94% but we randomly sub-sampled the same number of observations in each case  
148 (5,258 encounters or 95% of the number of observations at the 94% proximity index threshold).  
149 For each proximity index threshold, we obtained 200 effect size estimates with different random  
150 sub-samples.

151

152

153 **Results**

154

155 *LPS-induced sickness behaviour reduces association rates*

156       Compared to the control group, 'sick' (LPS-injected) bats associated with fewer  
157 groupmates (lower degree centrality), spent less time with them (lower strength centrality), and  
158 were less socially connected to the entire network (lower eigenvector centrality), and these  
159 effects diminished with time (Figure 1, Table 1). During the hours of the treatment period, a  
160 control bat had on average a 49% chance of associating with each control bat ([95% CI: 44, 54],  
161 n = 105 pairs), but only a 35% chance of associating with each 'sick' bat ([31, 38], n = 240  
162 pairs). During the treatment period, the mean association rate for two control bats was 15 min  
163 per h [13, 18], but for a control and 'sick' bat, it was only 10 min per h ([8, 11], Figure 2).

164

165 *Effect sizes and detectability of sickness effects depend on network construction*

166       When we increased the minimum threshold of time defining an association, we observed  
167 that the estimate of the treatment effect grew larger, but eventually became smaller and less  
168 clear as the number of observations decreased (Figure 3A). When only using associations over  
169 15 min, the effect became harder to detect. Next, when we increased the minimum proximity  
170 index threshold defining an association, we again observed that the treatment effect estimate  
171 grew larger but less clear as the number of observations declined (Figure 3B). When controlling  
172 for the number of observations, the treatment effect was relatively stable across different  
173 proximity thresholds (Figure S2).

174



175

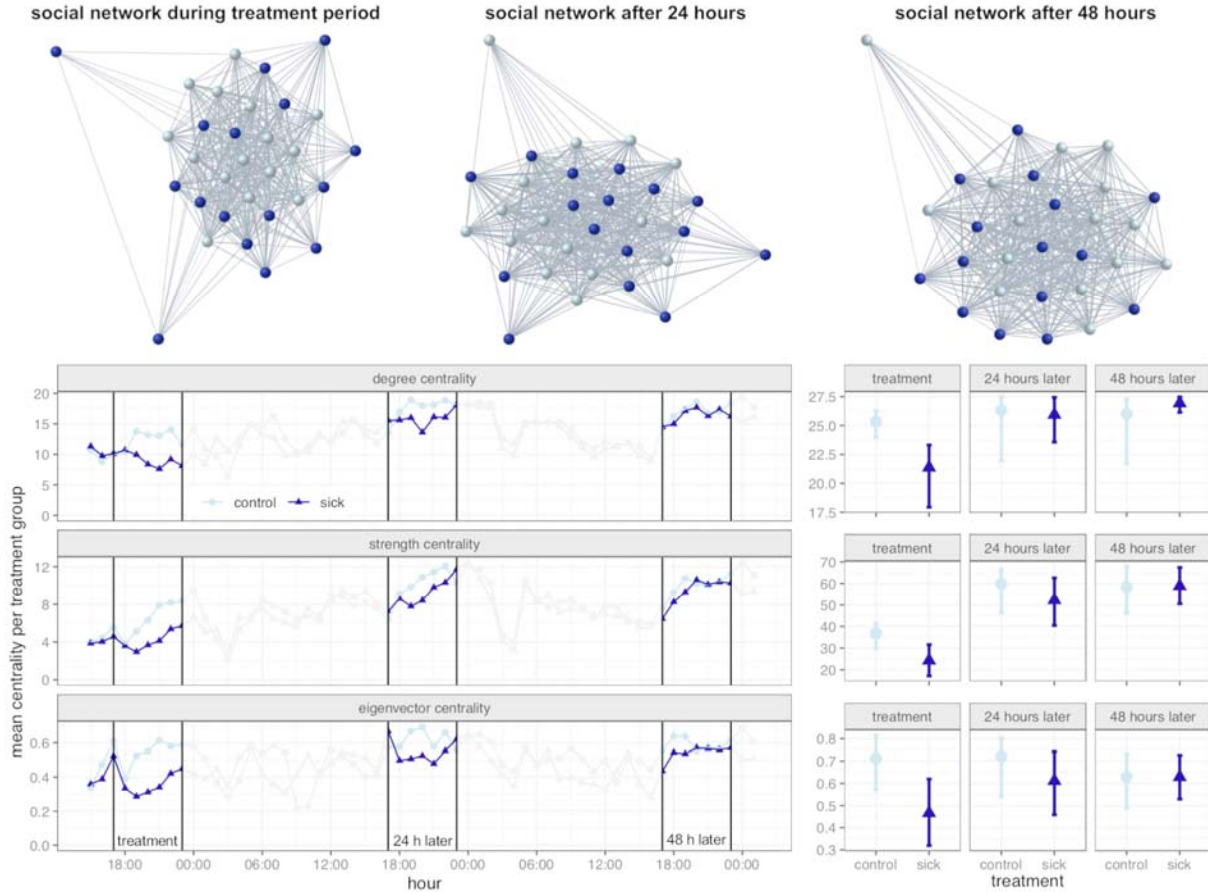

176

177 **Figure 1. Centrality decreased in LPS-injected bats.** 'Sick' LPS-injected bats (dark nodes)  
178 were less socially connected than control bats (light nodes) and this effect diminished over 48  
179 hours. Edge weights are association times ( $\log_{10}$ -transformed). Spatial positions are based on  
180 the graph embedder (GEM) force-directed layout algorithm. Left-hand time-series panel shows  
181 that three measures of mean centrality (degree, strength, and eigenvector) were lower in the  
182 'sick' test group (dark triangles) compared to the control group (light circles). Solid vertical lines  
183 show the treatment period and the corresponding hours on the next two days. Right-hand  
184 panels show the centrality measures of each group during the entire treatment and post-  
185 treatment periods. Centrality values in the right-hand panel are higher because networks were  
186 constructed for the whole period. Values for strength centrality are hours rather than seconds.  
187 Error bars are bootstrapped 95% confidence intervals.

188

189 **Table 1. Model estimates of LPS treatment on network centrality.** Standardized coefficients  
 190 ( $\beta$ ) and two-sided p-values are reported for degree, strength, or eigenvector centrality.

| Fixed effect                | Degree  |        | Strength |       | Eigenvector |       |
|-----------------------------|---------|--------|----------|-------|-------------|-------|
|                             | $\beta$ | p      | $\beta$  | p     | $\beta$     | p     |
| Interaction (treatment*day) | 0.60    | 0.001  | 0.31     | 0.01  | 0.49        | 0.002 |
| Treatment                   | -1.47   | 0.0008 | -0.91    | 0.002 | -1.41       | 0.005 |
| Treatment (within day 1)    | -0.86   | 0.0076 | -0.86    | 0.016 | -0.81       | 0.025 |
| Treatment (within day 3)    | 0.29    | ns     | 0.02     | ns    | -0.003      | ns    |

191

192

193

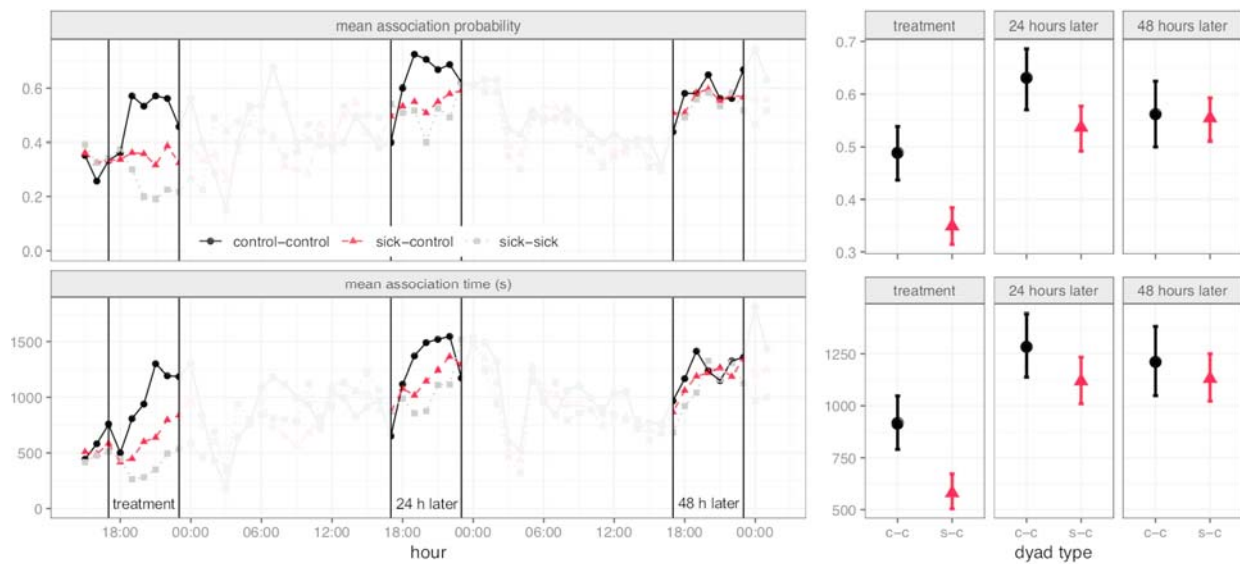

194

195 **Figure 2. Saline-injected control bats associated less with LPS-injected 'sick' bats.** The  
 196 hourly association probability (top) and mean association time (bottom) are shown for two  
 197 control bats (black circles), two sick bats (grey squares), and one of each (red triangle). Panel B  
 198 shows the hourly probability (top) and mean time (bottom) of association between a control bat

199 and another control bat (black circles) or a control and a 'sick' bat (red triangles), during each  
200 period. Error bars are bootstrapped 95% confidence intervals.  
201

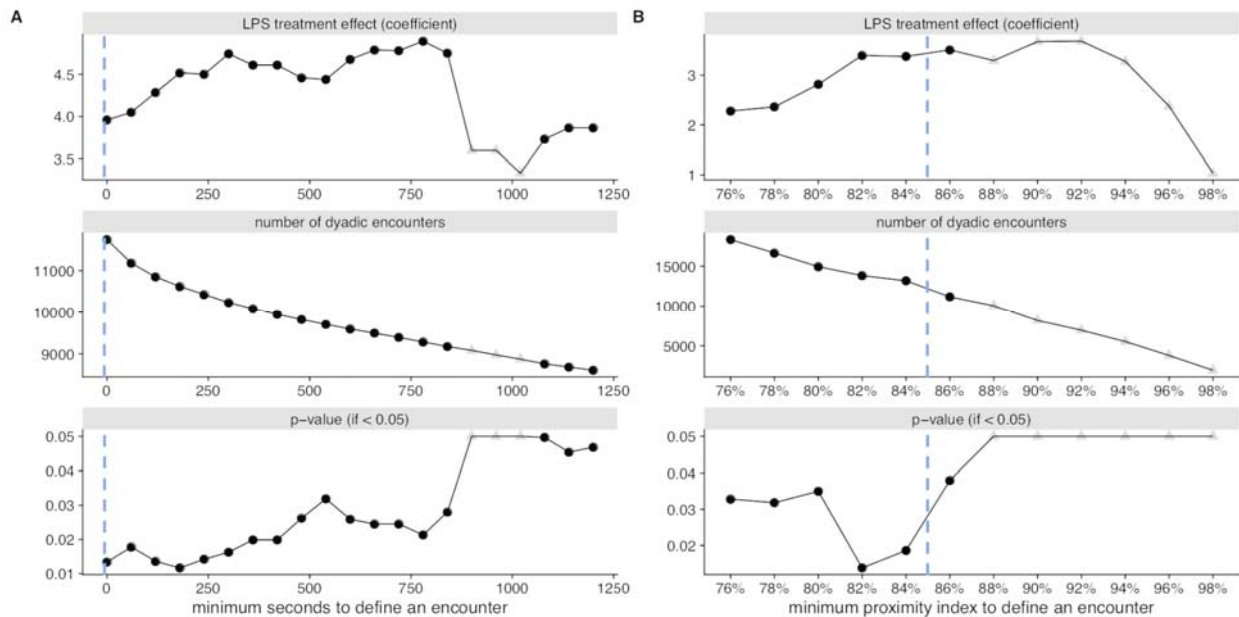

202 **Figure 3. Network construction alters the magnitude and detectability of treatment effects**  
203

204 **on degree centrality.** Association rates are based on many encounters that can be defined by  
205 a minimum duration (A) or proximity (B). Panel A shows how the minimum threshold of time to  
206 define a social encounter (x-axis) affects the estimate of the treatment coefficient (top), the  
207 sample size of dyadic encounters (middle), and the p-value for the parametric model (cropped  
208 at 0.05). Panel B shows how the same measures are affected when social encounters are  
209 defined using a different minimum estimate of relative spatial proximity. Dashed lines shows  
210 duration and proximity index thresholds used in main analysis. Grey triangles indicate estimates  
211 with parametric p-values >0.05. Note that this p-value is based on violated assumptions of  
212 normality and independence, so it should be used only as a proxy for relative detectability, not  
213 for actual inference.

214

215

## 216 Discussion

217           Sickness effects, induced by LPS injections, decreased the network connectivity of ‘sick’  
218 bats (Figure 1), and reduced the probability of encounters and the association times between  
219 female vampire bats in the ‘sick’ and control group (Figure 2). These effects were not caused by  
220 spatial assortativity of ‘sick’ bats, because associations between two ‘sick’ bats were even lower  
221 (Figure 2). The behavioural changes causing these effects are evident from captive studies  
222 showing that LPS-injected vampire bats are less active [7]. They also produce fewer contact  
223 calls [12], which attract bonded partners [13]. When tested in a flight cage, ‘sick’ vampire bats  
224 engaged in social grooming with fewer partners [6], but we observed dramatic reductions in  
225 social grooming even when captive pairs were forced into close association [7]. LPS-induced  
226 sickness behaviours therefore reduce both associations and behaviours, like social grooming,  
227 which can further enhance pathogen transmission between associated bats.

228           The effects of LPS vary by dose and among species [14]. For instance, in LPS-injected  
229 rats, social exploration of juvenile conspecifics and locomotor activity largely returned to normal  
230 after 24 hours [15]. Here, we found evidence for behavioural effects after 24 hours, which could  
231 be due to an ongoing immune challenge, exhaustion post-recovery, or an attempt to save  
232 energy from not foraging on the previous night. The observed pattern could also result from  
233 control bats avoiding the test group based on past interactions, but captive studies on LPS  
234 effects have not observed clear evidence for avoidance behaviour [6, 7].

235           Restructuring of social networks following an infection can occur through four  
236 nonmutually exclusive processes. First, as we observed here, infection-induced lethargy can  
237 passively reduce associations (mice: [2], humans: [3]). Second, individuals might actively avoid  
238 contact with infected conspecifics (e.g. lobsters: [16], bullfrog tadpoles: [17], mice: [18],  
239 mandrills: [19]). Third, individuals might actively and collectively restructure their social structure  
240 (eusocial insects: [1, 20]; humans: [21]). Fourth, parasites can manipulate host behaviour to  
241 restructure host networks in favour of parasite transmission [22, 23]. These processes can also

242 interact. For example, infection-induced changes in host behaviour can induce feedbacks that  
243 alter parasite manipulation behaviour on both developmental and evolutionary timescales [22].

244         Depending on the goals of a study, sickness behaviour or pathogen transmission can be  
245 measured or modelled at varying spatial and temporal scales. Studies using passive integrated  
246 transponder tags to track free-ranging mice showed a decreased probability of sharing a  
247 nestbox [2]. Here, proximity sensors allowed us to continuously measure proximity, even within  
248 a single roost. On a larger spatial and temporal scale, pathogen transmission crucially depends  
249 on movements between roosts and sites (e.g. rabies in vampire bats [24]). Conceptually or  
250 mathematically, the social network of transmission rates between individuals within each site  
251 can be embedded within a single node of a larger network mapping transmission rates between  
252 sites (e.g. [25]).

253         When defining network edges with continuous proximity data, there is a trade-off  
254 between the number of observations and filtering closer encounters that are more relevant for a  
255 given behaviour or pathogen. In this study, we used resampling to show the effect of defining  
256 association at various thresholds of minimum duration and distance (Figure 3). We recommend  
257 this resampling procedure for testing the robustness of an effect across the range of durations  
258 or distances that are biologically meaningful (Figure S2). As tracking technology improves the  
259 capacity to create dynamic networks from massive, high-resolution datasets, we expect  
260 researchers to gain transformative insights into the patterns and processes underlying the  
261 spread of pathogens, information, or behavioural states.

262

263

## 264 **Ethics statement**

265 This work was approved by the Institutional Animal Care and Use Committee and the American  
266 Museum of Natural History (Protocol # AMNHACUC-20180123).

267

268 **Data and code availability**

269 The datasets and R code for this article can be found at Figshare:

270 <https://doi.org/10.6084/m9.figshare.12045450.v2>

271

272 **Acknowledgements**

273 We thank Michelle Nowak for help with fieldwork and data collection. We thank Brock Fenton,

274 Nancy Simmons, and Dan Becker for help with logistics and permits. We thank Frieder Mayer

275 for funding and Björn Cassens and Niklas Duda for technological support.

276

277 **Funding**

278 This study was funded by the Deutsche Forschungsgemeinschaft [research unit FOR-1508] to

279 Frieder Mayer and by a National Geographic Society to Gerald Carter [Research Grant WW-

280 057R-17].

281

282 **Competing interests**

283 The authors declare that no competing interests exist.

284

285 **Author contributions**

286 GGC conceived of the study. SPR and GGC participated in fieldwork, data collection, analysis,

287 and writing. SS created the LPS treatments and participated in writing. All authors gave final

288 approval for publication and agree to be held accountable for the work performed therein.

289

290

291 **References**

- 292 1. Stroeymeyt N., Grasse A.V., Crespi A., Mersch D.P., Cremer S., Keller L. 2018 Social  
293 network plasticity decreases disease transmission in a eusocial insect. *Science* 362(6417), 941-  
294 945.
- 295 2. Lopes P.C., Block P., König B. 2016 Infection-induced behavioural changes reduce  
296 connectivity and the potential for disease spread in wild mice contact networks. *Sci Rep* 6,  
297 31790.
- 298 3. Van Kerckhove K., Hens N., Edmunds W.J., Eames K.T. 2013 The impact of illness on  
299 social networks: implications for transmission and control of influenza. *Am J Epidemiol* 178(11),  
300 1655-1662.
- 301 4. Farine D. 2017 The dynamics of transmission and the dynamics of networks. *J Anim*  
302 *Ecol* 86(3), 415-418.
- 303 5. Ripperger S.P., Carter G.G., Page R.A., Duda N., Koelpin A., Weigel R., Hartmann M.,  
304 Nowak T., Thielecke J., Schadhauer M., et al. 2020 Thinking small: next-generation sensor  
305 networks close the size gap in vertebrate biologging. *PLoS Biol* 18(4), e3000655.
- 306 6. Stockmaier S., Bolnick D.I., Page R.A., Carter G.G. (in press) Sickness effects on social  
307 interactions depend on the type of behaviour and relationship. *J Anim Ecol*.
- 308 7. Stockmaier S., Bolnick D.I., Page R.A., Carter G.G. 2018 An immune challenge reduces  
309 social grooming in vampire bats. *Anim Behav* 140, 141-149.
- 310 8. Ripperger S.P., Carter G.G., Duda N., Koelpin A., Cassens B., Kapitza R., Josic D.,  
311 Berrío-Martínez J., Page R.A., Mayer F. 2019 Vampire bats that cooperate in the lab maintain  
312 their social networks in the wild. *Curr Biol* 29(23), 4139-4144. e4134.
- 313 9. Duda N., Nowak T., Hartmann M., Schadhauer M., Cassens B., Wägemann P., Nabeel  
314 M., Ripperger S., Herbst S., Meyer-Wegener K., et al. 2018 BATS: Adaptive ultra low power  
315 sensor network for animal tracking. *Sensors* 18(10), 3343.

- 316 10. O'Mara M.T., Wikelski M., Dechmann D.K. 2014 50 years of bat tracking: device  
317 attachment and future directions. *Methods Ecol Evol* 5(4), 311-319.
- 318 11. Farine D.R. 2017 A guide to null models for animal social network analysis. *Methods*  
319 *Ecol Evol* 8(10), 1309-1320.
- 320 12. Stockmaier S., Bolnick D., Page R., Josic D., Carter G. (in review) An immune challenge  
321 reduces contact calling in vampire bats.
- 322 13. Carter G.G., Wilkinson G.S. 2016 Common vampire bat contact calls attract past food-  
323 sharing partners. *Anim Behav* 116, 45-51.
- 324 14. Warren H.S., Fitting C., Hoff E., Adib-Conquy M., Beasley-Topliffe L., Tesini B., Liang X.,  
325 Valentine C., Hellman J., Hayden D. 2010 Resilience to bacterial infection: difference between  
326 species could be due to proteins in serum. *J Infect Dis* 201(2), 223-232.
- 327 15. Deak T., Bellamy C., Bordner K.A. 2005 Protracted increases in core body temperature  
328 and interleukin-1 following acute administration of lipopolysaccharide: implications for the stress  
329 response. *Physiol Behav* 85(3), 296-307.
- 330 16. Behringer D.C., Butler M.J., Shields J.D. 2006 Avoidance of disease by social lobsters.  
331 *Nature* 441(7092), 421-421.
- 332 17. Kiesecker J.M., Skelly D.K., Beard K.H., Preisser E. 1999 Behavioral reduction of  
333 infection risk. *P Natl Acad Sci USA* 96(16), 9165-9168.
- 334 18. Boillat M., Challet L., Rossier D., Kan C., Carleton A., Rodriguez I. 2015 The  
335 vomeronasal system mediates sick conspecific avoidance. *Curr Biol* 25(2), 251-255.
- 336 19. Poirotte C., Massol F., Herbert A., Willaume E., Bomo P.M., Kappeler P.M., Charpentier  
337 M.J. 2017 Mandrills use olfaction to socially avoid parasitized conspecifics. *Sci Adv* 3(4),  
338 e1601721.
- 339 20. Cremer S., Pull C.D., Fürst M.A. 2018 Social immunity: emergence and evolution of  
340 colony-level disease protection. *Annu Rev Entomol* 63, 105-123.



- 341 21. Wang C., Liu L., Hao X., Guo H., Wang Q., Huang J., He N., Yu H., Lin X., Pan A. 2020  
342 Evolving Epidemiology and Impact of Non-pharmaceutical Interventions on the Outbreak of  
343 Coronavirus Disease 2019 in Wuhan, China. *medRxiv*.  
344 (doi:<https://doi.org/10.1101/2020.03.03.20030593>).
- 345 22. Ezenwa V.O., Archie E.A., Craft M.E., Hawley D.M., Martin L.B., Moore J., White L. 2016  
346 Host behaviour–parasite feedback: an essential link between animal behaviour and disease  
347 ecology. *Proc Roy Soc B BiolSci* 283(1828), 20153078.
- 348 23. Klein S.L. 2003 Parasite manipulation of the proximate mechanisms that mediate social  
349 behavior in vertebrates. *Physiol Behav* 79(3), 441-449.
- 350 24. Blackwood J.C., Streicker D.G., Altizer S., Rohani P. 2013 Resolving the roles of  
351 immunity, pathogenesis, and immigration for rabies persistence in vampire bats. *P Natl Acad*  
352 *Sci USA* 110(51), 20837-20842.
- 353 25. Montiglio P.-O., Gotanda K.M., Kratochwil C.F., Laskowski K.L., Farine D.R. 2020  
354 Hierarchically embedded interaction networks represent a missing link in the study of behavioral  
355 and community ecology. *Behav Ecol* 31(2), 279-286.
- 356
